# Supplementary material
Source: HighWire-hosted journal article supplement (http://www.cmaj.ca/highwire/filestream/74398/field_highwire_adjunct_files/0/190578-com-1-at.pdf)
Supplement: 190578-com-1-at.pdf [file 190578-com-1-at.pdf]

## Appendix 1 (as supplied by the authors)

| STRATEGIC DIRECTIONS             | KEY INITIATIVES                                                             |           |                                   |                     |
|----------------------------------|-----------------------------------------------------------------------------|-----------|-----------------------------------|---------------------|
|                                  | 2016-2017                                                                   | 2017-2018 | 2018-2019                         | 2019-2020           |
| Appropriateness of Care          | Provincial ICU Delirium                                                     |           |                                   |                     |
|                                  | Orientation Program for Adult Critical Care in Alberta (OPACCA) Partnership |           |                                   |                     |
|                                  |                                                                             |           |                                   | Transitions in Care |
| Research & Innovation            | PRIHS 1 - ICU Capacity Strain                                               |           |                                   |                     |
|                                  | PRIHS 1 - Evidence Care Gaps                                                |           |                                   |                     |
|                                  | Alberta Innovates and Canadian Institute of Health Research                 |           |                                   |                     |
| Emerging & Partnered Initiatives | MEDEC Partnership - Sepsis                                                  |           |                                   |                     |
|                                  | Transfusion Medicine Initiative                                             |           |                                   |                     |
| Supporting Decision Making       | Key Performance Indicators                                                  |           |                                   |                     |
|                                  | eCritical, CKCM                                                             |           |                                   |                     |
| PRINCIPLES                       | Patient & Family Centred Care                                               |           | Evidence Informed Decision Making |                     |
|                                  |                                                                             |           | Quality Improvement               |                     |
